# Supplementary material for: Distribution, diversity and persistence of Listeria monocytogenes in swine slaughterhouses and their association with food and human listeriosis strains
Source: PubMed Central journal article supplement (PMC7410256; doi:10.1371/journal.pone.0236807), 2020-08-06

# S1 Fig. Pulsotype diversity of *L. monocytogenes* isolated from four swine slaughterhouses in Quebec, Canada

A. Pulsotype diversity according to the seasons (A:Fall, B:Winter, C:Spring, D:Summer)

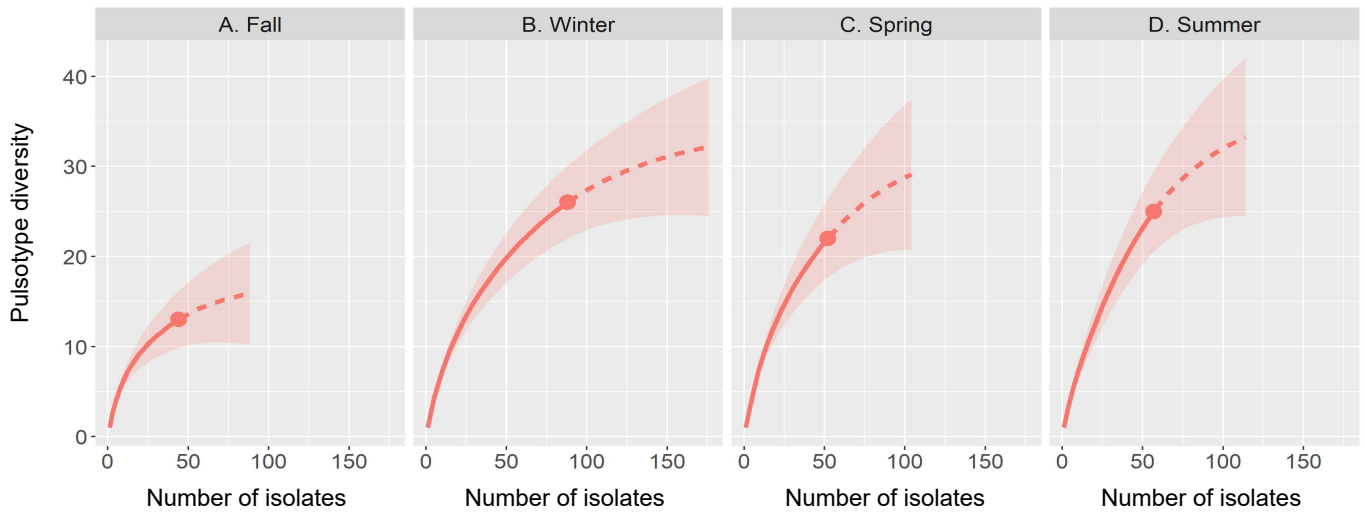

B. Pulsotype diversity according to slaughterhouses (A, B, C, D)

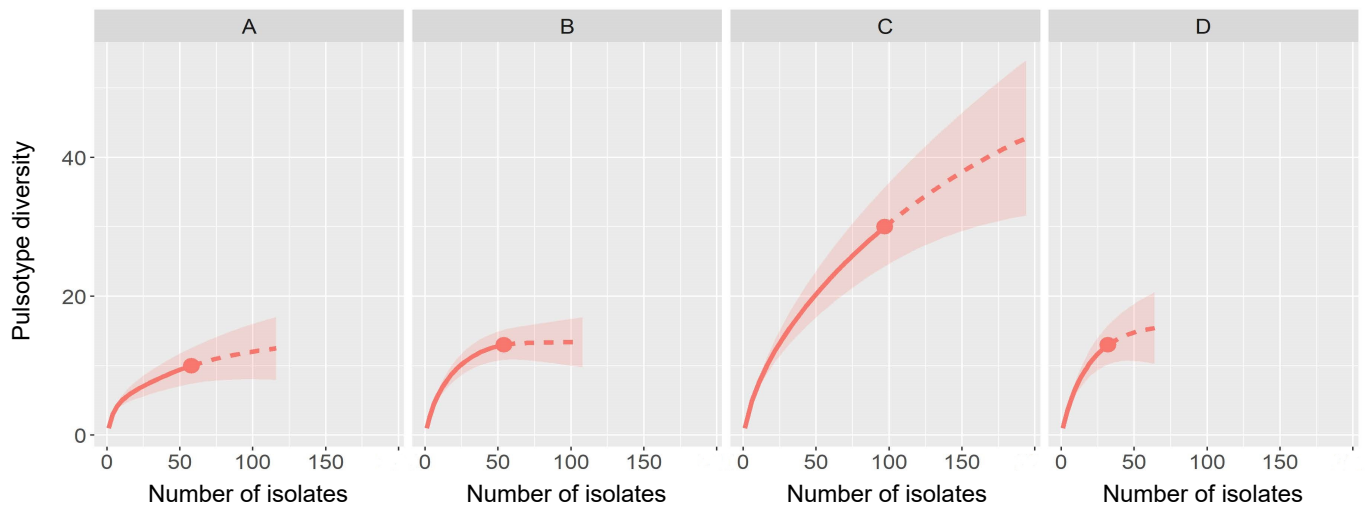

C. Pulsotype diversity according to the operation areas in the slaughterhouse (A:Lairage, B:Slaughtering and bleeding, C:Dehairing and evisceration, D:Chilling and hanging, E:Cutting and deboning)

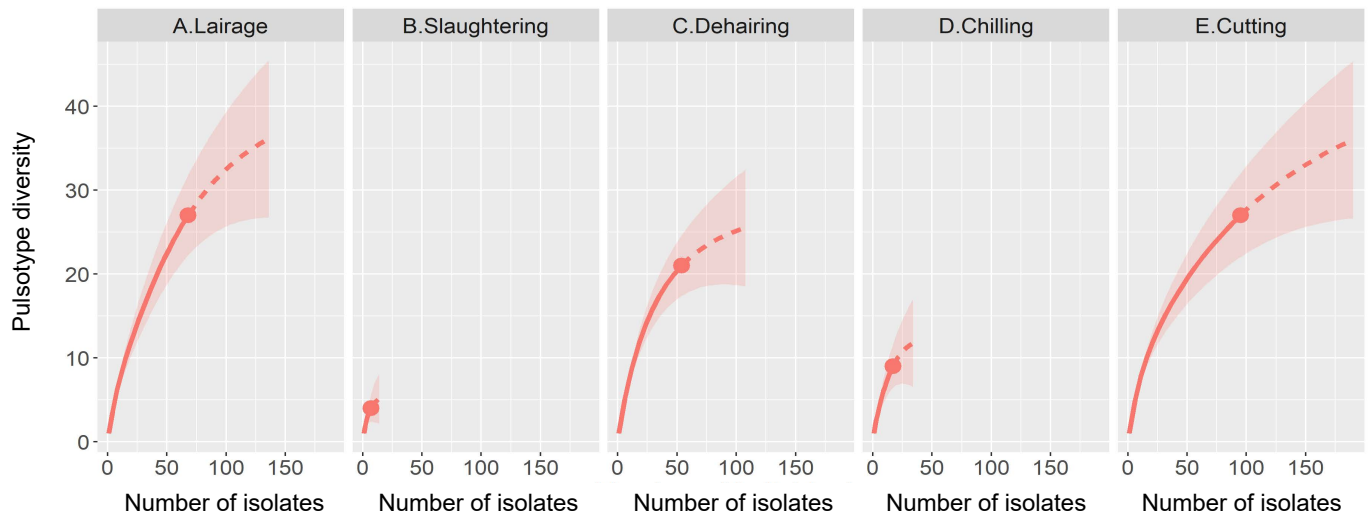

Supplement: pone.0236807.s001.pdf [file pone.0236807.s001.pdf]
