# Supplementary material for: Distribution, diversity and persistence of Listeria monocytogenes in swine slaughterhouses and their association with food and human listeriosis strains
Source: PubMed Central journal article supplement (PMC7410256; doi:10.1371/journal.pone.0236807), 2020-08-06
Supplement: pone.0236807.s002.pdf [file pone.0236807.s002.pdf]

**S1 Table. Sampling of four slaughterhouses in Quebec, Canada, for the isolation of *Listeria monocytogenes*.**

| <b>Operation areas and specific sites, machines and materials</b>                                                     | <b>Number of samples per visit, per slaughterhouse<sup>a</sup></b> | <b>In regular contact with animal carcasses and meat</b> | <b>Category<sup>b</sup></b> | <b>Subjected to in-site cleaning and sanitation (with QAC)</b> |
|-----------------------------------------------------------------------------------------------------------------------|--------------------------------------------------------------------|----------------------------------------------------------|-----------------------------|----------------------------------------------------------------|
| <b>Lairage</b>                                                                                                        |                                                                    |                                                          |                             |                                                                |
| Concrete slab of the Main entrance to the slaughterhouse (5 surfaces X 1 m <sup>2</sup> each, with the same lab wipe) | 1                                                                  | No                                                       | Environment                 | NA                                                             |
| Pen for sick animals (1 pen; 5 samples; 1 m <sup>2</sup> each)                                                        | 5                                                                  | No                                                       | Environment                 | NA                                                             |
| Pens for normal animals (9 pens; 5 samples per pen; 1 m <sup>2</sup> each)                                            | 45                                                                 | No                                                       | Environment                 | NA                                                             |
| Hallway floor (5 surfaces X 1 m <sup>2</sup> each, with the same lab wipe)                                            | 1                                                                  | No                                                       | Environment                 | NA                                                             |
| Hallway wall (5 surfaces X 1 m <sup>2</sup> each, with the same lab wipe)                                             | 1                                                                  | No                                                       | Environment                 | NA                                                             |
| <b>Slaughtering and bleeding and dehairing</b>                                                                        |                                                                    |                                                          |                             |                                                                |
| Floor (1 m <sup>2</sup> )                                                                                             | 6                                                                  | No                                                       | Environment                 | NA                                                             |
| Wall (3 surfaces X 1 m <sup>2</sup> each, with the same lab wipe)                                                     | 2                                                                  | No                                                       | Environment                 | NA                                                             |
| Ceiling (3 surfaces X 1 m <sup>2</sup> each, with the same lab wipe)                                                  | 1                                                                  | No                                                       | Environment                 | NA                                                             |
| Bleeding equipment (knife and sharpener)                                                                              | 1                                                                  | Yes                                                      | Material                    | NA                                                             |
| Tables (3 tables X 1 m <sup>2</sup> each with the same lab wipe)                                                      | 3                                                                  | Yes                                                      | Material                    | NA                                                             |
| Scalding tank (5 surfaces X 1 m <sup>2</sup> each with the same lab wipe)                                             | 1                                                                  | Yes                                                      | Machine                     | NA                                                             |

| <b>Operation areas and specific sites, machines and materials</b>             | <b>Number of samples per visit, per slaughterhouse<sup>a</sup></b> | <b>In regular contact with animal carcasses and meat</b> | <b>Category<sup>b</sup></b> | <b>Subjected to in-site cleaning and sanitation (with QAC)</b> |
|-------------------------------------------------------------------------------|--------------------------------------------------------------------|----------------------------------------------------------|-----------------------------|----------------------------------------------------------------|
| Dehairing machine (5 surfaces X 1 m <sup>2</sup> each with the same lab wipe) | 2                                                                  | Yes                                                      | Machine                     | NA                                                             |
| Brushing machine (5 surfaces X 1 m <sup>2</sup> each with the same lab wipe)  | 2                                                                  | Yes                                                      | Machine                     | NA                                                             |
| <b>Evisceration</b>                                                           |                                                                    |                                                          |                             |                                                                |
| Floor (1 m <sup>2</sup> )                                                     | 6                                                                  | No                                                       | Environment                 | High                                                           |
| Wall (3 surfaces 1 m <sup>2</sup> each, with the same lab wipe)               | 2                                                                  | No                                                       | Environment                 | High                                                           |
| Ceiling (3 surfaces, 1 m <sup>2</sup> each, with the same lab wipe)           | 1                                                                  | No                                                       | Environment                 | Low                                                            |
| Clipping machine                                                              | 1                                                                  | SC                                                       | Machine                     | Low                                                            |
| Sternal splitter                                                              | 1                                                                  | SC                                                       | Machine                     | Low                                                            |
| Visceral container                                                            | 3                                                                  | SC                                                       | Material                    | Low                                                            |
| Back splitter                                                                 | 1                                                                  | SC                                                       | Machine                     | Low                                                            |
| Degreasing knife                                                              | 1                                                                  | SC                                                       | Machine                     | Low                                                            |
| Knives                                                                        | 1                                                                  | SC                                                       | Material                    | Low                                                            |
| Gloves                                                                        | 1                                                                  | SC                                                       | Material                    | Low                                                            |
| Sharpener                                                                     | 1                                                                  | SC                                                       | Material                    | Low                                                            |
| Apron                                                                         | 1                                                                  | SC                                                       | Material                    | Low                                                            |
| Hooks (10 hooks with the same lab wipe)                                       | 3                                                                  | SC                                                       | Material                    | Low                                                            |
| <b>Chilling and hanging</b>                                                   |                                                                    |                                                          |                             |                                                                |
| Door (1 m <sup>2</sup> )                                                      | 2                                                                  | No                                                       | Environment                 | High                                                           |
| Floor (1 m <sup>2</sup> )                                                     | 3                                                                  | No                                                       | Environment                 | High                                                           |
| Wall (1 m <sup>2</sup> )                                                      | 3                                                                  | No                                                       | Environment                 | High                                                           |
| <b>Cutting and deboning</b>                                                   |                                                                    |                                                          |                             |                                                                |
| Floor (1 m <sup>2</sup> )                                                     | 5                                                                  | No                                                       | Environment                 | High                                                           |

| <b>Operation areas and specific sites, machines and materials</b>   | <b>Number of samples per visit, per slaughterhouse<sup>a</sup></b> | <b>In regular contact with animal carcasses and meat</b> | <b>Category<sup>b</sup></b> | <b>Subjected to in-site cleaning and sanitation (with QAC)</b> |
|---------------------------------------------------------------------|--------------------------------------------------------------------|----------------------------------------------------------|-----------------------------|----------------------------------------------------------------|
| Wall (3 surfaces X 1 m <sup>2</sup> each, with the same lab wipe)   | 2                                                                  | No                                                       | Environment                 | High                                                           |
| Ceiling (3 surfaces X 1m <sup>2</sup> each, with the same lab wipe) | 1                                                                  | No                                                       | Environment                 | Low                                                            |
| Post                                                                | 2                                                                  | No                                                       | Environment                 | High                                                           |
| Fan                                                                 | 2                                                                  | No                                                       | Environment                 | Low                                                            |
| Door (1 m <sup>2</sup> )                                            | 2                                                                  | No                                                       | Environment                 | High                                                           |
| Conveyor belt 1 (top and bottom sides)                              | 6                                                                  | SC                                                       | Environment                 | High                                                           |
| Conveyor belt 2 (top and bottom sides)                              | 6                                                                  | SC                                                       | Environment                 | High                                                           |
| Conveyor belt 3 (top and bottom sides)                              | 6                                                                  | SC                                                       | Environment                 | High                                                           |
| Conveyor belt 4 (top and bottom sides)                              | 6                                                                  | SC                                                       | Environment                 | High                                                           |
| Conveyor belt 5 (top and bottom sides)                              | 6                                                                  | SC                                                       | Environment                 | High                                                           |
| Saws                                                                | 1                                                                  | SC                                                       | Machine                     | Low                                                            |
| Knives (3 knives per sample; total 9 knives: 3 samples)             | 3                                                                  | SC                                                       | Material                    | Low                                                            |
| Sharpeners (3 sharpeners per sample; total 9 sharpeners: 3 samples) | 3                                                                  | SC                                                       | Material                    | Low                                                            |
| Shelves (3 surfaces X 1m <sup>2</sup> each, with the same lab wipe) | 3                                                                  | SC                                                       | Material                    | Low                                                            |

QAC: Quaternary ammonium compounds

NA: Not applicable: QAC were not used in these operation areas

High: surfaces which are more exposed to QAC

Low: surfaces which are weakly exposed to QAC

<sup>a</sup> Number of samples collected during one visit, per slaughterhouse. Each slaughterhouse was visited four times.

<sup>b</sup> Specific sampled sites, machines and materials were grouped into three categories (environment, material or machine) for statistical analyses.
